# Supplementary material
Source: publisher figshare collection journal article supplement (https://gsajournals.figshare.com/ndownloader/files/26653109)
Supplement: Supplementary file 1 [file 26653109]

## Sheet: Sheet1
Table S8: Dinucleotide frequencies in Zymoseptoria TE versus gene sequences.
Species	Dinucleotide pair	Obs Count	Obs Frequency	Exp Frequency	Obs/Exp Frequency	Localisation	Type
Arg00	AA	1011719	0.0585937	0.0625	0.9375	America	Gene
Arg00	AC	1121208	0.0649348	0.0625	1.03896	America	Gene
Arg00	AG	1166895	0.0675807	0.0625	1.08129	America	Gene
Arg00	AT	885664	0.0512932	0.0625	0.820692	America	Gene
Arg00	CA	1333196	0.0772121	0.0625	1.23539	America	Gene
Arg00	CC	1170315	0.0677788	0.0625	1.08446	America	Gene
Arg00	CG	1344517	0.0778677	0.0625	1.24588	America	Gene
Arg00	CT	1067556	0.0618275	0.0625	0.98924	America	Gene
Arg00	GA	1439050	0.0833426	0.0625	1.33348	America	Gene
Arg00	GC	1334659	0.0772968	0.0625	1.23675	America	Gene
Arg00	GG	1136862	0.0658414	0.0625	1.05346	America	Gene
Arg00	GT	792301	0.0458861	0.0625	0.734178	America	Gene
Arg00	TA	397883	0.0230434	0.0625	0.368694	America	Gene
Arg00	TC	1289402	0.0746757	0.0625	1.19481	America	Gene
Arg00	TG	1058235	0.0612877	0.0625	0.980603	America	Gene
Arg00	TT	717219	0.0415377	0.0625	0.664604	America	Gene
Aus01	AA	1046086	0.0587939	0.0625	0.940702	Oceania	Gene
Aus01	AC	1153451	0.0648282	0.0625	1.03725	Oceania	Gene
Aus01	AG	1210205	0.068018	0.0625	1.08829	Oceania	Gene
Aus01	AT	912798	0.0513026	0.0625	0.820842	Oceania	Gene
Aus01	CA	1374089	0.0772289	0.0625	1.23566	Oceania	Gene
Aus01	CC	1204386	0.0676909	0.0625	1.08306	Oceania	Gene
Aus01	CG	1372969	0.0771659	0.0625	1.23465	Oceania	Gene
Aus01	CT	1100837	0.0618711	0.0625	0.989938	Oceania	Gene
Aus01	GA	1483338	0.0833691	0.0625	1.33391	Oceania	Gene
Aus01	GC	1374078	0.0772283	0.0625	1.23565	Oceania	Gene
Aus01	GG	1174956	0.0660369	0.0625	1.05659	Oceania	Gene
Aus01	GT	816027	0.0458637	0.0625	0.73382	Oceania	Gene
Aus01	TA	415156	0.0233333	0.0625	0.373333	Oceania	Gene
Aus01	TC	1320364	0.0742093	0.0625	1.18735	Oceania	Gene
Aus01	TG	1094142	0.0614948	0.0625	0.983917	Oceania	Gene
Aus01	TT	739543	0.041565	0.0625	0.665041	Oceania	Gene
CH95	AA	1001609	0.0585645	0.0625	0.937033	America	Gene
CH95	AC	1109940	0.0648987	0.0625	1.03838	America	Gene
CH95	AG	1154755	0.0675191	0.0625	1.08031	America	Gene
CH95	AT	878131	0.0513447	0.0625	0.821516	America	Gene
CH95	CA	1318352	0.0770847	0.0625	1.23335	America	Gene
CH95	CC	1157247	0.0676648	0.0625	1.08264	America	Gene
CH95	CG	1332264	0.0778981	0.0625	1.24637	America	Gene
CH95	CT	1056804	0.0617918	0.0625	0.988669	America	Gene
CH95	GA	1425041	0.0833228	0.0625	1.33316	America	Gene
CH95	GC	1322183	0.0773087	0.0625	1.23694	America	Gene
CH95	GG	1127731	0.065939	0.0625	1.05502	America	Gene
CH95	GT	785896	0.0459517	0.0625	0.735227	America	Gene
CH95	TA	395842	0.0231451	0.0625	0.370321	America	Gene
CH95	TC	1275296	0.0745672	0.0625	1.19307	America	Gene
CH95	TG	1049693	0.061376	0.0625	0.982017	America	Gene
CH95	TT	711867	0.0416232	0.0625	0.665971	America	Gene
CNR93	AA	996618	0.0584544	0.0625	0.93527	America	Gene
CNR93	AC	1105025	0.0648127	0.0625	1.037	America	Gene
CNR93	AG	1152736	0.0676111	0.0625	1.08178	America	Gene
CNR93	AT	875535	0.0513525	0.0625	0.82164	America	Gene
CNR93	CA	1311546	0.0769258	0.0625	1.23081	America	Gene
CNR93	CC	1149899	0.0674447	0.0625	1.07912	America	Gene
CNR93	CG	1328842	0.0779402	0.0625	1.24704	America	Gene
CNR93	CT	1054121	0.0618271	0.0625	0.989233	America	Gene
CNR93	GA	1420639	0.0833244	0.0625	1.33319	America	Gene
CNR93	GC	1319589	0.0773975	0.0625	1.23836	America	Gene
CNR93	GG	1125114	0.065991	0.0625	1.05586	America	Gene
CNR93	GT	785064	0.0460461	0.0625	0.736738	America	Gene
CNR93	TA	397414	0.0233094	0.0625	0.372951	America	Gene
CNR93	TC	1269895	0.0744828	0.0625	1.19172	America	Gene
CNR93	TG	1047412	0.0614336	0.0625	0.982937	America	Gene
CNR93	TT	710056	0.0416467	0.0625	0.666348	America	Gene
CRI10	AA	1003434	0.058538	0.0625	0.936607	Europe	Gene
CRI10	AC	1113179	0.0649402	0.0625	1.03904	Europe	Gene
CRI10	AG	1156478	0.0674662	0.0625	1.07946	Europe	Gene
CRI10	AT	880204	0.051349	0.0625	0.821584	Europe	Gene
CRI10	CA	1322752	0.0771662	0.0625	1.23466	Europe	Gene
CRI10	CC	1160189	0.0676827	0.0625	1.08292	Europe	Gene
CRI10	CG	1336072	0.0779433	0.0625	1.24709	Europe	Gene
CRI10	CT	1060265	0.0618533	0.0625	0.989654	Europe	Gene
CRI10	GA	1427319	0.0832664	0.0625	1.33226	Europe	Gene
CRI10	GC	1325298	0.0773147	0.0625	1.23704	Europe	Gene
CRI10	GG	1127720	0.0657885	0.0625	1.05262	Europe	Gene
CRI10	GT	787939	0.0459665	0.0625	0.735464	Europe	Gene
CRI10	TA	396200	0.0231134	0.0625	0.369814	Europe	Gene
CRI10	TC	1280612	0.0747079	0.0625	1.19533	Europe	Gene
CRI10	TG	1051596	0.0613476	0.0625	0.981562	Europe	Gene
CRI10	TT	712325	0.0415554	0.0625	0.664886	Europe	Gene
I93	AA	998197	0.0584061	0.0625	0.934498	America	Gene
I93	AC	1109224	0.0649025	0.0625	1.03844	America	Gene
I93	AG	1151275	0.0673629	0.0625	1.07781	America	Gene
I93	AT	877999	0.0513731	0.0625	0.82197	America	Gene
I93	CA	1318887	0.0771702	0.0625	1.23472	America	Gene
I93	CC	1158009	0.067757	0.0625	1.08411	America	Gene
I93	CG	1332165	0.0779471	0.0625	1.24715	America	Gene
I93	CT	1057440	0.0618725	0.0625	0.98996	America	Gene
I93	GA	1422034	0.0832055	0.0625	1.33129	America	Gene
I93	GC	1321781	0.0773395	0.0625	1.23743	America	Gene
I93	GG	1124857	0.0658172	0.0625	1.05307	America	Gene
I93	GT	785863	0.0459821	0.0625	0.735714	America	Gene
I93	TA	393985	0.0230527	0.0625	0.368843	America	Gene
I93	TC	1277485	0.0747477	0.0625	1.19596	America	Gene
I93	TG	1049832	0.0614273	0.0625	0.982838	America	Gene
I93	TT	711597	0.0416367	0.0625	0.666187	America	Gene
IPO323	AA	959576	0.0503926	0.0625	0.806282	Europe	Gene
IPO323	AC	1069371	0.0561586	0.0625	0.898537	Europe	Gene
IPO323	AG	1235610	0.0648887	0.0625	1.03822	Europe	Gene
IPO323	AT	989749	0.0519772	0.0625	0.831635	Europe	Gene
IPO323	CA	1328579	0.069771	0.0625	1.11634	Europe	Gene
IPO323	CC	1246088	0.065439	0.0625	1.04702	Europe	Gene
IPO323	CG	1449047	0.0760975	0.0625	1.21756	Europe	Gene
IPO323	CT	1240590	0.0651502	0.0625	1.0424	Europe	Gene
IPO323	GA	1493607	0.0784376	0.0625	1.255	Europe	Gene
IPO323	GC	1450448	0.076171	0.0625	1.21874	Europe	Gene
IPO323	GG	1244618	0.0653618	0.0625	1.04579	Europe	Gene
IPO323	GT	1071273	0.0562585	0.0625	0.900135	Europe	Gene
IPO323	TA	470796	0.0247241	0.0625	0.395586	Europe	Gene
IPO323	TC	1496662	0.078598	0.0625	1.25757	Europe	Gene
IPO323	TG	1332422	0.0699728	0.0625	1.11957	Europe	Gene
IPO323	TT	963552	0.0506014	0.0625	0.809623	Europe	Gene
IR01_48b	AA	982713	0.0583763	0.0625	0.934021	Middle East	Gene
IR01_48b	AC	1091477	0.0648373	0.0625	1.0374	Middle East	Gene
IR01_48b	AG	1134984	0.0674217	0.0625	1.07875	Middle East	Gene
IR01_48b	AT	864341	0.0513447	0.0625	0.821514	Middle East	Gene
IR01_48b	CA	1298487	0.0771343	0.0625	1.23415	Middle East	Gene
IR01_48b	CC	1138378	0.0676233	0.0625	1.08197	Middle East	Gene
IR01_48b	CG	1313298	0.0780141	0.0625	1.24823	Middle East	Gene
IR01_48b	CT	1040185	0.0617904	0.0625	0.988646	Middle East	Gene
IR01_48b	GA	1402165	0.0832931	0.0625	1.33269	Middle East	Gene
IR01_48b	GC	1302330	0.0773626	0.0625	1.2378	Middle East	Gene
IR01_48b	GG	1111253	0.066012	0.0625	1.05619	Middle East	Gene
IR01_48b	GT	775252	0.0460525	0.0625	0.73684	Middle East	Gene
IR01_48b	TA	386652	0.0229684	0.0625	0.367494	Middle East	Gene
IR01_48b	TC	1258163	0.074739	0.0625	1.19582	Middle East	Gene
IR01_48b	TG	1034964	0.0614802	0.0625	0.983683	Middle East	Gene
IR01_48b	TT	699458	0.0415501	0.0625	0.664801	Middle East	Gene
ISY92	AA	990595	0.0584478	0.0625	0.935165	Africa	Gene
ISY92	AC	1099945	0.0648997	0.0625	1.0384	Africa	Gene
ISY92	AG	1143142	0.0674485	0.0625	1.07918	Africa	Gene
ISY92	AT	869811	0.0513212	0.0625	0.821139	Africa	Gene
ISY92	CA	1309137	0.0772426	0.0625	1.23588	Africa	Gene
ISY92	CC	1147796	0.0677231	0.0625	1.08357	Africa	Gene
ISY92	CG	1321262	0.077958	0.0625	1.24733	Africa	Gene
ISY92	CT	1047710	0.0618177	0.0625	0.989084	Africa	Gene
ISY92	GA	1411275	0.083269	0.0625	1.3323	Africa	Gene
ISY92	GC	1310750	0.0773378	0.0625	1.2374	Africa	Gene
ISY92	GG	1116055	0.0658503	0.0625	1.0536	Africa	Gene
ISY92	GT	779561	0.0459962	0.0625	0.735939	Africa	Gene
ISY92	TA	388996	0.0229518	0.0625	0.367229	Africa	Gene
ISY92	TC	1267414	0.0747809	0.0625	1.19649	Africa	Gene
ISY92	TG	1040672	0.0614025	0.0625	0.982439	Africa	Gene
ISY92	TT	704254	0.0415529	0.0625	0.664846	Africa	Gene
KE94	AA	990179	0.0584436	0.0625	0.935097	Africa	Gene
KE94	AC	1099440	0.0648925	0.0625	1.03828	Africa	Gene
KE94	AG	1142049	0.0674074	0.0625	1.07852	Africa	Gene
KE94	AT	870313	0.0513687	0.0625	0.821899	Africa	Gene
KE94	CA	1308513	0.0772327	0.0625	1.23572	Africa	Gene
KE94	CC	1146823	0.0676892	0.0625	1.08303	Africa	Gene
KE94	CG	1320019	0.0779118	0.0625	1.24659	Africa	Gene
KE94	CT	1047650	0.0618357	0.0625	0.989371	Africa	Gene
KE94	GA	1410280	0.0832393	0.0625	1.33183	Africa	Gene
KE94	GC	1309567	0.0772949	0.0625	1.23672	Africa	Gene
KE94	GG	1115379	0.0658333	0.0625	1.05333	Africa	Gene
KE94	GT	779756	0.0460237	0.0625	0.73638	Africa	Gene
KE94	TA	389486	0.0229887	0.0625	0.36782	Africa	Gene
KE94	TC	1267175	0.0747928	0.0625	1.19668	Africa	Gene
KE94	TG	1041058	0.0614466	0.0625	0.983146	Africa	Gene
KE94	TT	704791	0.0415991	0.0625	0.665585	Africa	Gene
OregS90	AA	1021383	0.0584764	0.0625	0.935622	America	Gene
OregS90	AC	1134539	0.0649548	0.0625	1.03928	America	Gene
OregS90	AG	1182277	0.0676879	0.0625	1.08301	America	Gene
OregS90	AT	894302	0.0512007	0.0625	0.819211	America	Gene
OregS90	CA	1343412	0.0769132	0.0625	1.23061	America	Gene
OregS90	CC	1181640	0.0676514	0.0625	1.08242	America	Gene
OregS90	CG	1364822	0.078139	0.0625	1.25022	America	Gene
OregS90	CT	1079376	0.0617966	0.0625	0.988745	America	Gene
OregS90	GA	1455425	0.0833262	0.0625	1.33322	America	Gene
OregS90	GC	1353446	0.0774877	0.0625	1.2398	America	Gene
OregS90	GG	1150132	0.0658475	0.0625	1.05356	America	Gene
OregS90	GT	803847	0.046022	0.0625	0.736351	America	Gene
OregS90	TA	408463	0.0233854	0.0625	0.374166	America	Gene
OregS90	TC	1299626	0.0744064	0.0625	1.1905	America	Gene
OregS90	TG	1069436	0.0612275	0.0625	0.97964	America	Gene
OregS90	TT	724469	0.0414774	0.0625	0.663638	America	Gene
Zt1A5	AA	3618437	0.0502195	0.0625	0.803511	Europe	Gene
Zt1A5	AC	4030074	0.0559325	0.0625	0.894919	Europe	Gene
Zt1A5	AG	4663831	0.0647282	0.0625	1.03565	Europe	Gene
Zt1A5	AT	3737054	0.0518657	0.0625	0.829851	Europe	Gene
Zt1A5	CA	5019032	0.069658	0.0625	1.11453	Europe	Gene
Zt1A5	CC	4747273	0.0658863	0.0625	1.05418	Europe	Gene
Zt1A5	CG	5515281	0.0765453	0.0625	1.22473	Europe	Gene
Zt1A5	CT	4688041	0.0650642	0.0625	1.04103	Europe	Gene
Zt1A5	GA	5659403	0.0785455	0.0625	1.25673	Europe	Gene
Zt1A5	GC	5499900	0.0763318	0.0625	1.22131	Europe	Gene
Zt1A5	GG	4742651	0.0658222	0.0625	1.05315	Europe	Gene
Zt1A5	GT	4034904	0.0559995	0.0625	0.895992	Europe	Gene
Zt1A5	TA	1747248	0.0242497	0.0625	0.387994	Europe	Gene
Zt1A5	TC	5672722	0.0787304	0.0625	1.25969	Europe	Gene
Zt1A5	TG	5034986	0.0698794	0.0625	1.11807	Europe	Gene
Zt1A5	TT	3641660	0.0505418	0.0625	0.808668	Europe	Gene
Zt1E4	AA	3615757	0.0503069	0.0625	0.80491	Europe	Gene
Zt1E4	AC	4023352	0.0559779	0.0625	0.895646	Europe	Gene
Zt1E4	AG	4649086	0.0646839	0.0625	1.03494	Europe	Gene
Zt1E4	AT	3731729	0.0519204	0.0625	0.830727	Europe	Gene
Zt1E4	CA	5011462	0.0697257	0.0625	1.11561	Europe	Gene
Zt1E4	CC	4731905	0.0658361	0.0625	1.05338	Europe	Gene
Zt1E4	CG	5501369	0.0765419	0.0625	1.22467	Europe	Gene
Zt1E4	CT	4679334	0.0651047	0.0625	1.04168	Europe	Gene
Zt1E4	GA	5643076	0.0785135	0.0625	1.25622	Europe	Gene
Zt1E4	GC	5488215	0.0763589	0.0625	1.22174	Europe	Gene
Zt1E4	GG	4720063	0.0656714	0.0625	1.05074	Europe	Gene
Zt1E4	GT	4021285	0.0559491	0.0625	0.895186	Europe	Gene
Zt1E4	TA	1744324	0.0242692	0.0625	0.388307	Europe	Gene
Zt1E4	TC	5660905	0.0787615	0.0625	1.26018	Europe	Gene
Zt1E4	TG	5022090	0.0698735	0.0625	1.11798	Europe	Gene
Zt1E4	TT	3629893	0.0505036	0.0625	0.808057	Europe	Gene
Zt3D1	AA	3573951	0.0501147	0.0625	0.801835	Europe	Gene
Zt3D1	AC	3989204	0.0559374	0.0625	0.894999	Europe	Gene
Zt3D1	AG	4617508	0.0647476	0.0625	1.03596	Europe	Gene
Zt3D1	AT	3695729	0.0518223	0.0625	0.829156	Europe	Gene
Zt3D1	CA	4967993	0.0696622	0.0625	1.1146	Europe	Gene
Zt3D1	CC	4700497	0.0659113	0.0625	1.05458	Europe	Gene
Zt3D1	CG	5466213	0.0766483	0.0625	1.22637	Europe	Gene
Zt3D1	CT	4640154	0.0650652	0.0625	1.04104	Europe	Gene
Zt3D1	GA	5607541	0.0786301	0.0625	1.25808	Europe	Gene
Zt3D1	GC	5445398	0.0763565	0.0625	1.2217	Europe	Gene
Zt3D1	GG	4695129	0.065836	0.0625	1.05338	Europe	Gene
Zt3D1	GT	3993909	0.0560034	0.0625	0.896054	Europe	Gene
Zt3D1	TA	1721885	0.0241446	0.0625	0.386314	Europe	Gene
Zt3D1	TC	5620141	0.0788067	0.0625	1.26091	Europe	Gene
Zt3D1	TG	4982535	0.0698661	0.0625	1.11786	Europe	Gene
Zt3D1	TT	3597691	0.0504475	0.0625	0.807161	Europe	Gene
Zt3D7	AA	3387780	0.0502071	0.0625	0.803314	Europe	Gene
Zt3D7	AC	3765861	0.0558103	0.0625	0.892965	Europe	Gene
Zt3D7	AG	4358359	0.0645912	0.0625	1.03346	Europe	Gene
Zt3D7	AT	3485677	0.051658	0.0625	0.826527	Europe	Gene
Zt3D7	CA	4696699	0.0696054	0.0625	1.11369	Europe	Gene
Zt3D7	CC	4466563	0.0661947	0.0625	1.05912	Europe	Gene
Zt3D7	CG	5191546	0.076939	0.0625	1.23102	Europe	Gene
Zt3D7	CT	4385313	0.0649906	0.0625	1.03985	Europe	Gene
Zt3D7	GA	5308175	0.0786675	0.0625	1.25868	Europe	Gene
Zt3D7	GC	5167776	0.0765868	0.0625	1.22539	Europe	Gene
Zt3D7	GG	4456839	0.0660506	0.0625	1.05681	Europe	Gene
Zt3D7	GT	3765420	0.0558038	0.0625	0.89286	Europe	Gene
Zt3D7	TA	1605661	0.023796	0.0625	0.380736	Europe	Gene
Zt3D7	TC	5326028	0.0789321	0.0625	1.26291	Europe	Gene
Zt3D7	TG	4705366	0.0697338	0.0625	1.11574	Europe	Gene
Zt3D7	TT	3403036	0.0504332	0.0625	0.806931	Europe	Gene
TN09	AA	974788	0.0584205	0.0625	0.934728	Africa	Gene
TN09	AC	1081358	0.0648074	0.0625	1.03692	Africa	Gene
TN09	AG	1125625	0.0674604	0.0625	1.07937	Africa	Gene
TN09	AT	857418	0.0513863	0.0625	0.822181	Africa	Gene
TN09	CA	1288286	0.0772089	0.0625	1.23534	Africa	Gene
TN09	CC	1125609	0.0674594	0.0625	1.07935	Africa	Gene
TN09	CG	1298942	0.0778475	0.0625	1.24556	Africa	Gene
TN09	CT	1031381	0.0618122	0.0625	0.988995	Africa	Gene
TN09	GA	1389439	0.0832711	0.0625	1.33234	Africa	Gene
TN09	GC	1290115	0.0773185	0.0625	1.2371	Africa	Gene
TN09	GG	1100417	0.0659496	0.0625	1.05519	Africa	Gene
TN09	GT	769115	0.0460942	0.0625	0.737507	Africa	Gene
TN09	TA	383259	0.0229693	0.0625	0.367509	Africa	Gene
TN09	TC	1247136	0.0747427	0.0625	1.19588	Africa	Gene
TN09	TG	1027520	0.0615808	0.0625	0.985293	Africa	Gene
TN09	TT	695311	0.041671	0.0625	0.666736	Africa	Gene
UR95	AA	999533	0.0584432	0.0625	0.935091	Europe	Gene
UR95	AC	1109620	0.06488	0.0625	1.03808	Europe	Gene
UR95	AG	1153097	0.0674221	0.0625	1.07875	Europe	Gene
UR95	AT	878655	0.0513754	0.0625	0.822006	Europe	Gene
UR95	CA	1319870	0.0771734	0.0625	1.23477	Europe	Gene
UR95	CC	1155959	0.0675895	0.0625	1.08143	Europe	Gene
UR95	CG	1332666	0.0779216	0.0625	1.24675	Europe	Gene
UR95	CT	1058244	0.061876	0.0625	0.990016	Europe	Gene
UR95	GA	1423395	0.0832266	0.0625	1.33163	Europe	Gene
UR95	GC	1322274	0.077314	0.0625	1.23702	Europe	Gene
UR95	GG	1125568	0.0658125	0.0625	1.053	Europe	Gene
UR95	GT	787544	0.0460481	0.0625	0.736769	Europe	Gene
UR95	TA	394534	0.0230686	0.0625	0.369097	Europe	Gene
UR95	TC	1278885	0.074777	0.0625	1.19643	Europe	Gene
UR95	TG	1051024	0.0614539	0.0625	0.983262	Europe	Gene
UR95	TT	711771	0.0416176	0.0625	0.665881	Europe	Gene
YEQ92	AA	975855	0.0584303	0.0625	0.934885	Africa	Gene
YEQ92	AC	1083820	0.0648948	0.0625	1.03832	Africa	Gene
YEQ92	AG	1126474	0.0674488	0.0625	1.07918	Africa	Gene
YEQ92	AT	857254	0.051329	0.0625	0.821263	Africa	Gene
YEQ92	CA	1289067	0.0771842	0.0625	1.23495	Africa	Gene
YEQ92	CC	1130221	0.0676731	0.0625	1.08277	Africa	Gene
YEQ92	CG	1302406	0.0779829	0.0625	1.24773	Africa	Gene
YEQ92	CT	1031576	0.0617667	0.0625	0.988267	Africa	Gene
YEQ92	GA	1391870	0.0833396	0.0625	1.33343	Africa	Gene
YEQ92	GC	1291394	0.0773235	0.0625	1.23718	Africa	Gene
YEQ92	GG	1101504	0.0659537	0.0625	1.05526	Africa	Gene
YEQ92	GT	768548	0.0460176	0.0625	0.736281	Africa	Gene
YEQ92	TA	383182	0.0229434	0.0625	0.367095	Africa	Gene
YEQ92	TC	1247835	0.0747154	0.0625	1.19545	Africa	Gene
YEQ92	TG	1026361	0.0614544	0.0625	0.983271	Africa	Gene
YEQ92	TT	693812	0.0415427	0.0625	0.664683	Africa	Gene
Zp13	AA	894516	0.0503067	0.0625	0.804907	Sister species	Gene
Zp13	AC	997995	0.0561262	0.0625	0.898019	Sister species	Gene
Zp13	AG	1155113	0.0649624	0.0625	1.0394	Sister species	Gene
Zp13	AT	919075	0.0516878	0.0625	0.827005	Sister species	Gene
Zp13	CA	1242430	0.069873	0.0625	1.11797	Sister species	Gene
Zp13	CC	1172043	0.0659145	0.0625	1.05463	Sister species	Gene
Zp13	CG	1358058	0.0763758	0.0625	1.22201	Sister species	Gene
Zp13	CT	1153461	0.0648695	0.0625	1.03791	Sister species	Gene
Zp13	GA	1397938	0.0786186	0.0625	1.2579	Sister species	Gene
Zp13	GC	1354497	0.0761755	0.0625	1.21881	Sister species	Gene
Zp13	GG	1170744	0.0658414	0.0625	1.05346	Sister species	Gene
Zp13	GT	1000262	0.0562537	0.0625	0.90006	Sister species	Gene
Zp13	TA	430100	0.0241884	0.0625	0.387014	Sister species	Gene
Zp13	TC	1399688	0.078717	0.0625	1.25947	Sister species	Gene
Zp13	TG	1241241	0.0698061	0.0625	1.1169	Sister species	Gene
Zp13	TT	894100	0.0502833	0.0625	0.804532	Sister species	Gene
Zpa63	AA	796504	0.049849	0.0625	0.797583	Sister species	Gene
Zpa63	AC	901568	0.0564244	0.0625	0.90279	Sister species	Gene
Zpa63	AG	1028126	0.0643449	0.0625	1.02952	Sister species	Gene
Zpa63	AT	811360	0.0507787	0.0625	0.812459	Sister species	Gene
Zpa63	CA	1107007	0.0692817	0.0625	1.10851	Sister species	Gene
Zpa63	CC	1073294	0.0671718	0.0625	1.07475	Sister species	Gene
Zpa63	CG	1245183	0.0779294	0.0625	1.24687	Sister species	Gene
Zpa63	CT	1024230	0.0641011	0.0625	1.02562	Sister species	Gene
Zpa63	GA	1251445	0.0783213	0.0625	1.25314	Sister species	Gene
Zpa63	GC	1226069	0.0767331	0.0625	1.22773	Sister species	Gene
Zpa63	GG	1080478	0.0676214	0.0625	1.08194	Sister species	Gene
Zpa63	GT	902572	0.0564872	0.0625	0.903795	Sister species	Gene
Zpa63	TA	381012	0.0238455	0.0625	0.381528	Sister species	Gene
Zpa63	TC	1247138	0.0780517	0.0625	1.24883	Sister species	Gene
Zpa63	TG	1108367	0.0693668	0.0625	1.10987	Sister species	Gene
Zpa63	TT	793996	0.049692	0.0625	0.795072	Sister species	Gene
Zt05	AA	939457	0.0506463	0.0625	0.810341	Europe	Gene
Zt05	AC	1045814	0.05638	0.0625	0.90208	Europe	Gene
Zt05	AG	1207135	0.0650768	0.0625	1.04123	Europe	Gene
Zt05	AT	959896	0.0517482	0.0625	0.82797	Europe	Gene
Zt05	CA	1296315	0.0698846	0.0625	1.11815	Europe	Gene
Zt05	CC	1220113	0.0657765	0.0625	1.05242	Europe	Gene
Zt05	CG	1413282	0.0761903	0.0625	1.21904	Europe	Gene
Zt05	CT	1203794	0.0648967	0.0625	1.03835	Europe	Gene
Zt05	GA	1457810	0.0785908	0.0625	1.25745	Europe	Gene
Zt05	GC	1412096	0.0761263	0.0625	1.21802	Europe	Gene
Zt05	GG	1218049	0.0656652	0.0625	1.05064	Europe	Gene
Zt05	GT	1040607	0.0560993	0.0625	0.897589	Europe	Gene
Zt05	TA	456902	0.0246317	0.0625	0.394107	Europe	Gene
Zt05	TC	1453614	0.0783646	0.0625	1.25383	Europe	Gene
Zt05	TG	1291915	0.0696473	0.0625	1.11436	Europe	Gene
Zt05	TT	932579	0.0502755	0.0625	0.804408	Europe	Gene
Zt10	AA	911580	0.0504165	0.0625	0.806665	Europe	Gene
Zt10	AC	1016677	0.0562291	0.0625	0.899666	Europe	Gene
Zt10	AG	1174326	0.0649482	0.0625	1.03917	Europe	Gene
Zt10	AT	936517	0.0517957	0.0625	0.828732	Europe	Gene
Zt10	CA	1263834	0.0698986	0.0625	1.11838	Europe	Gene
Zt10	CC	1192602	0.065959	0.0625	1.05534	Europe	Gene
Zt10	CG	1379687	0.076306	0.0625	1.2209	Europe	Gene
Zt10	CT	1173754	0.0649165	0.0625	1.03866	Europe	Gene
Zt10	GA	1421268	0.0786057	0.0625	1.25769	Europe	Gene
Zt10	GC	1378504	0.0762406	0.0625	1.21985	Europe	Gene
Zt10	GG	1186497	0.0656213	0.0625	1.04994	Europe	Gene
Zt10	GT	1014483	0.0561078	0.0625	0.897725	Europe	Gene
Zt10	TA	440628	0.0243697	0.0625	0.389915	Europe	Gene
Zt10	TC	1420344	0.0785546	0.0625	1.25687	Europe	Gene
Zt10	TG	1262033	0.069799	0.0625	1.11678	Europe	Gene
Zt10	TT	908234	0.0502315	0.0625	0.803704	Europe	Gene
Arg00	AA	612805	0.071923	0.0625	1.15077	America	TE
Arg00	AC	482453	0.056624	0.0625	0.905984	America	TE
Arg00	AG	716889	0.084139	0.0625	1.34622	America	TE
Arg00	AT	551202	0.0646928	0.0625	1.03509	America	TE
Arg00	CA	238494	0.0279913	0.0625	0.447861	America	TE
Arg00	CC	417357	0.0489839	0.0625	0.783742	America	TE
Arg00	CG	530044	0.0622096	0.0625	0.995354	America	TE
Arg00	CT	713971	0.0837965	0.0625	1.34074	America	TE
Arg00	GA	502740	0.059005	0.0625	0.94408	America	TE
Arg00	GC	500107	0.058696	0.0625	0.939136	America	TE
Arg00	GG	419909	0.0492834	0.0625	0.788534	America	TE
Arg00	GT	479233	0.0562461	0.0625	0.899937	America	TE
Arg00	TA	1009699	0.118505	0.0625	1.89608	America	TE
Arg00	TC	499720	0.0586506	0.0625	0.938409	America	TE
Arg00	TG	235130	0.0275965	0.0625	0.441543	America	TE
Arg00	TT	610539	0.071657	0.0625	1.14651	America	TE
Aus01	AA	294979	0.0677791	0.0625	1.08447	Oceania	TE
Aus01	AC	247286	0.0568204	0.0625	0.909127	Oceania	TE
Aus01	AG	351799	0.080835	0.0625	1.29336	Oceania	TE
Aus01	AT	263523	0.0605513	0.0625	0.968821	Oceania	TE
Aus01	CA	153190	0.0351994	0.0625	0.563191	Oceania	TE
Aus01	CC	235625	0.054141	0.0625	0.866256	Oceania	TE
Aus01	CG	277172	0.0636875	0.0625	1.019	Oceania	TE
Aus01	CT	352841	0.0810744	0.0625	1.29719	Oceania	TE
Aus01	GA	269191	0.0618537	0.0625	0.989659	Oceania	TE
Aus01	GC	268380	0.0616673	0.0625	0.986677	Oceania	TE
Aus01	GG	235403	0.05409	0.0625	0.86544	Oceania	TE
Aus01	GT	245886	0.0564987	0.0625	0.90398	Oceania	TE
Aus01	TA	440441	0.101203	0.0625	1.61925	Oceania	TE
Aus01	TC	267396	0.0614412	0.0625	0.983059	Oceania	TE
Aus01	TG	154474	0.0354944	0.0625	0.567911	Oceania	TE
Aus01	TT	294366	0.0676383	0.0625	1.08221	Oceania	TE
CH95	AA	552133	0.0717825	0.0625	1.14852	America	TE
CH95	AC	434741	0.0565204	0.0625	0.904327	America	TE
CH95	AG	640467	0.0832668	0.0625	1.33227	America	TE
CH95	AT	498042	0.0647502	0.0625	1.036	America	TE
CH95	CA	222731	0.0289571	0.0625	0.463314	America	TE
CH95	CC	383127	0.0498101	0.0625	0.796962	America	TE
CH95	CG	471097	0.0612471	0.0625	0.979953	America	TE
CH95	CT	645156	0.0838764	0.0625	1.34202	America	TE
CH95	GA	455736	0.05925	0.0625	0.948	America	TE
CH95	GC	442344	0.0575089	0.0625	0.920142	America	TE
CH95	GG	378987	0.0492719	0.0625	0.78835	America	TE
CH95	GT	434703	0.0565155	0.0625	0.904248	America	TE
CH95	TA	895193	0.116384	0.0625	1.86214	America	TE
CH95	TC	461575	0.0600091	0.0625	0.960146	America	TE
CH95	TG	221304	0.0287716	0.0625	0.460346	America	TE
CH95	TT	554413	0.0720789	0.0625	1.15326	America	TE
CNR93	AA	513465	0.070032	0.0625	1.12051	America	TE
CNR93	AC	413231	0.056361	0.0625	0.901776	America	TE
CNR93	AG	602247	0.0821411	0.0625	1.31426	America	TE
CNR93	AT	466906	0.0636818	0.0625	1.01891	America	TE
CNR93	CA	219863	0.0299874	0.0625	0.479798	America	TE
CNR93	CC	368090	0.0502042	0.0625	0.803267	America	TE
CNR93	CG	466306	0.0636	0.0625	1.0176	America	TE
CNR93	CT	605432	0.0825755	0.0625	1.32121	America	TE
CNR93	GA	435773	0.0594355	0.0625	0.950969	America	TE
CNR93	GC	437547	0.0596775	0.0625	0.95484	America	TE
CNR93	GG	372159	0.0507592	0.0625	0.812147	America	TE
CNR93	GT	419185	0.0571731	0.0625	0.91477	America	TE
CNR93	TA	827099	0.112809	0.0625	1.80494	America	TE
CNR93	TC	440483	0.060078	0.0625	0.961247	America	TE
CNR93	TG	224041	0.0305572	0.0625	0.488915	America	TE
CNR93	TT	520031	0.0709276	0.0625	1.13484	America	TE
CRI10	AA	560411	0.0720605	0.0625	1.15297	Europe	TE
CRI10	AC	436524	0.0561305	0.0625	0.898088	Europe	TE
CRI10	AG	661665	0.0850803	0.0625	1.36128	Europe	TE
CRI10	AT	497925	0.0640258	0.0625	1.02441	Europe	TE
CRI10	CA	226657	0.0291447	0.0625	0.466316	Europe	TE
CRI10	CC	384270	0.0494114	0.0625	0.790583	Europe	TE
CRI10	CG	460529	0.0592172	0.0625	0.947475	Europe	TE
CRI10	CT	660702	0.0849565	0.0625	1.3593	Europe	TE
CRI10	GA	459258	0.0590538	0.0625	0.94486	Europe	TE
CRI10	GC	452635	0.0582021	0.0625	0.931234	Europe	TE
CRI10	GG	385774	0.0496048	0.0625	0.793677	Europe	TE
CRI10	GT	434120	0.0558214	0.0625	0.893142	Europe	TE
CRI10	TA	910565	0.117085	0.0625	1.87336	Europe	TE
CRI10	TC	458516	0.0589583	0.0625	0.943334	Europe	TE
CRI10	TG	223822	0.0287802	0.0625	0.460483	Europe	TE
CRI10	TT	563574	0.0724672	0.0625	1.15948	Europe	TE
IR01_48b	AA	435547	0.071139	0.0625	1.13822	Middle East	TE
IR01_48b	AC	353326	0.0577097	0.0625	0.923354	Middle East	TE
IR01_48b	AG	522967	0.0854176	0.0625	1.36668	Middle East	TE
IR01_48b	AT	417429	0.0681798	0.0625	1.09088	Middle East	TE
IR01_48b	CA	114906	0.0187679	0.0625	0.300286	Middle East	TE
IR01_48b	CC	294417	0.0480879	0.0625	0.769406	Middle East	TE
IR01_48b	CG	400058	0.0653425	0.0625	1.04548	Middle East	TE
IR01_48b	CT	522415	0.0853274	0.0625	1.36524	Middle East	TE
IR01_48b	GA	349748	0.0571253	0.0625	0.914004	Middle East	TE
IR01_48b	GC	336442	0.054952	0.0625	0.879231	Middle East	TE
IR01_48b	GG	295459	0.0482581	0.0625	0.772129	Middle East	TE
IR01_48b	GT	352218	0.0575287	0.0625	0.920459	Middle East	TE
IR01_48b	TA	829325	0.135456	0.0625	2.16729	Middle East	TE
IR01_48b	TC	347482	0.0567551	0.0625	0.908082	Middle East	TE
IR01_48b	TG	115305	0.0188331	0.0625	0.301329	Middle East	TE
IR01_48b	TT	435432	0.0711202	0.0625	1.13792	Middle East	TE
ISY92	AA	535900	0.0706204	0.0625	1.12993	Middle East	TE
ISY92	AC	432415	0.0569833	0.0625	0.911732	Middle East	TE
ISY92	AG	645252	0.0850308	0.0625	1.36049	Middle East	TE
ISY92	AT	519217	0.068422	0.0625	1.09475	Middle East	TE
ISY92	CA	135591	0.0178681	0.0625	0.285889	Middle East	TE
ISY92	CC	360234	0.0474713	0.0625	0.759541	Middle East	TE
ISY92	CG	498982	0.0657554	0.0625	1.05209	Middle East	TE
ISY92	CT	651420	0.0858436	0.0625	1.3735	Middle East	TE
ISY92	GA	426743	0.0562358	0.0625	0.899773	Middle East	TE
ISY92	GC	415697	0.0547802	0.0625	0.876483	Middle East	TE
ISY92	GG	363305	0.047876	0.0625	0.766016	Middle East	TE
ISY92	GT	443282	0.0584153	0.0625	0.934645	Middle East	TE
ISY92	TA	1034811	0.136367	0.0625	2.18186	Middle East	TE
ISY92	TC	437654	0.0576737	0.0625	0.922779	Middle East	TE
ISY92	TG	141424	0.0186367	0.0625	0.298188	Middle East	TE
ISY92	TT	546527	0.0720209	0.0625	1.15233	Middle East	TE
KE94	AA	481379	0.0729078	0.0625	1.16653	Africa	TE
KE94	AC	374759	0.0567596	0.0625	0.908153	Africa	TE
KE94	AG	560169	0.084841	0.0625	1.35746	Africa	TE
KE94	AT	436060	0.066044	0.0625	1.0567	Africa	TE
KE94	CA	157032	0.0237835	0.0625	0.380535	Africa	TE
KE94	CC	319863	0.0484452	0.0625	0.775123	Africa	TE
KE94	CG	415778	0.0629721	0.0625	1.00755	Africa	TE
KE94	CT	558984	0.0846616	0.0625	1.35459	Africa	TE
KE94	GA	384122	0.0581776	0.0625	0.930842	Africa	TE
KE94	GC	374177	0.0566714	0.0625	0.906743	Africa	TE
KE94	GG	321056	0.0486259	0.0625	0.778015	Africa	TE
KE94	GT	374298	0.0566897	0.0625	0.907036	Africa	TE
KE94	TA	830214	0.125741	0.0625	2.01186	Africa	TE
KE94	TC	382614	0.0579492	0.0625	0.927188	Africa	TE
KE94	TG	156633	0.023723	0.0625	0.379568	Africa	TE
KE94	TT	475396	0.0720016	0.0625	1.15203	Africa	TE
OregS90	AA	557122	0.0693378	0.0625	1.10941	America	TE
OregS90	AC	455408	0.0566788	0.0625	0.90686	America	TE
OregS90	AG	653300	0.0813079	0.0625	1.30093	America	TE
OregS90	AT	496993	0.0618543	0.0625	0.989669	America	TE
OregS90	CA	282845	0.0352021	0.0625	0.563233	America	TE
OregS90	CC	413391	0.0514495	0.0625	0.823191	America	TE
OregS90	CG	503458	0.0626589	0.0625	1.00254	America	TE
OregS90	CT	652947	0.0812639	0.0625	1.30022	America	TE
OregS90	GA	487031	0.0606145	0.0625	0.969832	America	TE
OregS90	GC	498778	0.0620765	0.0625	0.993224	America	TE
OregS90	GG	417505	0.0519615	0.0625	0.831384	America	TE
OregS90	GT	454513	0.0565674	0.0625	0.905078	America	TE
OregS90	TA	836228	0.104075	0.0625	1.66519	America	TE
OregS90	TC	484757	0.0603315	0.0625	0.965304	America	TE
OregS90	TG	283577	0.0352932	0.0625	0.564691	America	TE
OregS90	TT	557041	0.0693277	0.0625	1.10924	America	TE
TN09	AA	499040	0.0700955	0.0625	1.12153	Africa	TE
TN09	AC	414947	0.0582837	0.0625	0.93254	Africa	TE
TN09	AG	603330	0.0847442	0.0625	1.35591	Africa	TE
TN09	AT	497081	0.0698203	0.0625	1.11713	Africa	TE
TN09	CA	108831	0.0152865	0.0625	0.244584	Africa	TE
TN09	CC	346928	0.0487298	0.0625	0.779676	Africa	TE
TN09	CG	480552	0.0674987	0.0625	1.07998	Africa	TE
TN09	CT	606547	0.085196	0.0625	1.36314	Africa	TE
TN09	GA	402388	0.0565197	0.0625	0.904315	Africa	TE
TN09	GC	376221	0.0528443	0.0625	0.845508	Africa	TE
TN09	GG	348006	0.0488812	0.0625	0.782099	Africa	TE
TN09	GT	415131	0.0583096	0.0625	0.932953	Africa	TE
TN09	TA	1004424	0.141082	0.0625	2.25731	Africa	TE
TN09	TC	404669	0.0568401	0.0625	0.909442	Africa	TE
TN09	TG	109765	0.0154177	0.0625	0.246683	Africa	TE
TN09	TT	501569	0.0704507	0.0625	1.12721	Africa	TE
UR95	AA	488513	0.0719622	0.0625	1.15139	Europe	TE
UR95	AC	387350	0.05706	0.0625	0.91296	Europe	TE
UR95	AG	574788	0.0846712	0.0625	1.35474	Europe	TE
UR95	AT	441833	0.0650858	0.0625	1.04137	Europe	TE
UR95	CA	181811	0.0267823	0.0625	0.428517	Europe	TE
UR95	CC	330896	0.0487438	0.0625	0.779901	Europe	TE
UR95	CG	419574	0.0618068	0.0625	0.98891	Europe	TE
UR95	CT	572522	0.0843374	0.0625	1.3494	Europe	TE
UR95	GA	401438	0.0591353	0.0625	0.946164	Europe	TE
UR95	GC	390129	0.0574693	0.0625	0.91951	Europe	TE
UR95	GG	333123	0.0490719	0.0625	0.78515	Europe	TE
UR95	GT	383472	0.0564887	0.0625	0.903819	Europe	TE
UR95	TA	821034	0.120945	0.0625	1.93513	Europe	TE
UR95	TC	396211	0.0583653	0.0625	0.933844	Europe	TE
UR95	TG	180651	0.0266114	0.0625	0.425783	Europe	TE
UR95	TT	485102	0.0714597	0.0625	1.14335	Europe	TE
YEQ92	AA	562523	0.0714285	0.0625	1.14286	Africa	TE
YEQ92	AC	454753	0.057744	0.0625	0.923904	Africa	TE
YEQ92	AG	674829	0.085689	0.0625	1.37102	Africa	TE
YEQ92	AT	549106	0.0697248	0.0625	1.1156	Africa	TE
YEQ92	CA	126280	0.0160349	0.0625	0.256558	Africa	TE
YEQ92	CC	377980	0.0479954	0.0625	0.767927	Africa	TE
YEQ92	CG	519696	0.0659904	0.0625	1.05585	Africa	TE
YEQ92	CT	675421	0.0857641	0.0625	1.37223	Africa	TE
YEQ92	GA	451498	0.0573307	0.0625	0.917291	Africa	TE
YEQ92	GC	416346	0.0528671	0.0625	0.845874	Africa	TE
YEQ92	GG	377166	0.0478921	0.0625	0.766273	Africa	TE
YEQ92	GT	451970	0.0573906	0.0625	0.91825	Africa	TE
YEQ92	TA	1101235	0.139833	0.0625	2.23734	Africa	TE
YEQ92	TC	450162	0.057161	0.0625	0.914576	Africa	TE
YEQ92	TG	125195	0.0158971	0.0625	0.254354	Africa	TE
YEQ92	TT	561171	0.0712568	0.0625	1.14011	Africa	TE
Za17	AA	571453	0.0694799	0.0625	1.11168	Sister species	TE
Za17	AC	491281	0.0597323	0.0625	0.955716	Sister species	TE
Za17	AG	691566	0.0840838	0.0625	1.34534	Sister species	TE
Za17	AT	665739	0.0809437	0.0625	1.2951	Sister species	TE
Za17	CA	36381	0.0044234	0.0625	0.070774	Sister species	TE
Za17	CC	380944	0.046317	0.0625	0.741071	Sister species	TE
Za17	CG	580654	0.0705986	0.0625	1.12958	Sister species	TE
Za17	CT	697249	0.0847748	0.0625	1.3564	Sister species	TE
Za17	GA	457966	0.0556817	0.0625	0.890907	Sister species	TE
Za17	GC	361412	0.0439422	0.0625	0.703075	Sister species	TE
Za17	GG	375466	0.0456509	0.0625	0.730415	Sister species	TE
Za17	GT	489699	0.0595399	0.0625	0.952639	Sister species	TE
Za17	TA	1354705	0.164711	0.0625	2.63538	Sister species	TE
Za17	TC	461533	0.0561154	0.0625	0.897846	Sister species	TE
Za17	TG	36909	0.0044876	0.0625	0.0718011	Sister species	TE
Za17	TT	571762	0.0695175	0.0625	1.11228	Sister species	TE
Zb87	AA	1133795	0.072953	0.0625	1.16725	Sister species	TE
Zb87	AC	883382	0.0568404	0.0625	0.909446	Sister species	TE
Zb87	AG	1372691	0.0883245	0.0625	1.41319	Sister species	TE
Zb87	AT	1172658	0.0754536	0.0625	1.20726	Sister species	TE
Zb87	CA	225330	0.0144987	0.0625	0.231978	Sister species	TE
Zb87	CC	734276	0.0472463	0.0625	0.755941	Sister species	TE
Zb87	CG	875438	0.0563293	0.0625	0.901268	Sister species	TE
Zb87	CT	1367939	0.0880188	0.0625	1.4083	Sister species	TE
Zb87	GA	850187	0.0547045	0.0625	0.875272	Sister species	TE
Zb87	GC	733808	0.0472162	0.0625	0.755459	Sister species	TE
Zb87	GG	737963	0.0474835	0.0625	0.759737	Sister species	TE
Zb87	GT	888744	0.0571854	0.0625	0.914967	Sister species	TE
Zb87	TA	2353739	0.151449	0.0625	2.42319	Sister species	TE
Zb87	TC	851485	0.054788	0.0625	0.876608	Sister species	TE
Zb87	TG	224730	0.01446	0.0625	0.231361	Sister species	TE
Zb87	TT	1135281	0.0730486	0.0625	1.16878	Sister species	TE
Zp13	AA	779956	0.0709043	0.0625	1.13447	Sister species	TE
Zp13	AC	597313	0.0543006	0.0625	0.86881	Sister species	TE
Zp13	AG	927868	0.0843507	0.0625	1.34961	Sister species	TE
Zp13	AT	720477	0.0654972	0.0625	1.04796	Sister species	TE
Zp13	CA	298322	0.0271199	0.0625	0.433918	Sister species	TE
Zp13	CC	493786	0.0448892	0.0625	0.718226	Sister species	TE
Zp13	CG	754275	0.0685697	0.0625	1.09712	Sister species	TE
Zp13	CT	930427	0.0845834	0.0625	1.35333	Sister species	TE
Zp13	GA	604902	0.0549905	0.0625	0.879848	Sister species	TE
Zp13	GC	779807	0.0708908	0.0625	1.13425	Sister species	TE
Zp13	GG	491649	0.0446949	0.0625	0.715118	Sister species	TE
Zp13	GT	593991	0.0539986	0.0625	0.863978	Sister species	TE
Zp13	TA	1342726	0.122065	0.0625	1.95304	Sister species	TE
Zp13	TC	605924	0.0550834	0.0625	0.881335	Sister species	TE
Zp13	TG	296549	0.0269587	0.0625	0.431339	Sister species	TE
Zp13	TT	782146	0.0711034	0.0625	1.13765	Sister species	TE
Zpa63	AA	1134630	0.0709405	0.0625	1.13505	Sister species	TE
Zpa63	AC	909265	0.05685	0.0625	0.9096	Sister species	TE
Zpa63	AG	1369493	0.0856248	0.0625	1.37	Sister species	TE
Zpa63	AT	1268403	0.0793044	0.0625	1.26887	Sister species	TE
Zpa63	CA	184801	0.0115543	0.0625	0.184869	Sister species	TE
Zpa63	CC	739267	0.0462212	0.0625	0.739539	Sister species	TE
Zpa63	CG	1019579	0.0637471	0.0625	1.01995	Sister species	TE
Zpa63	CT	1370440	0.085684	0.0625	1.37094	Sister species	TE
Zpa63	GA	907312	0.0567279	0.0625	0.907646	Sister species	TE
Zpa63	GC	756264	0.0472839	0.0625	0.756542	Sister species	TE
Zpa63	GG	741303	0.0463485	0.0625	0.741576	Sister species	TE
Zpa63	GT	908777	0.0568195	0.0625	0.909111	Sister species	TE
Zpa63	TA	2455836	0.153546	0.0625	2.45674	Sister species	TE
Zpa63	TC	909235	0.0568481	0.0625	0.90957	Sister species	TE
Zpa63	TG	183363	0.0114644	0.0625	0.18343	Sister species	TE
Zpa63	TT	1136147	0.0710353	0.0625	1.13657	Sister species	TE
Zt05	AA	685592	0.0714786	0.0625	1.14366	Europe	TE
Zt05	AC	535955	0.0558777	0.0625	0.894044	Europe	TE
Zt05	AG	806014	0.0840336	0.0625	1.34454	Europe	TE
Zt05	AT	597919	0.062338	0.0625	0.997408	Europe	TE
Zt05	CA	277241	0.0289047	0.0625	0.462475	Europe	TE
Zt05	CC	492859	0.0513846	0.0625	0.822154	Europe	TE
Zt05	CG	580909	0.0605646	0.0625	0.969033	Europe	TE
Zt05	CT	811997	0.0846574	0.0625	1.35452	Europe	TE
Zt05	GA	572847	0.059724	0.0625	0.955584	Europe	TE
Zt05	GC	555208	0.057885	0.0625	0.92616	Europe	TE
Zt05	GG	494618	0.051568	0.0625	0.825088	Europe	TE
Zt05	GT	540126	0.0563126	0.0625	0.901002	Europe	TE
Zt05	TA	1090303	0.113673	0.0625	1.81877	Europe	TE
Zt05	TC	579043	0.06037	0.0625	0.96592	Europe	TE
Zt05	TG	281135	0.0293106	0.0625	0.46897	Europe	TE
Zt05	TT	689800	0.0719173	0.0625	1.15068	Europe	TE
Zt10	AA	547534	0.0723017	0.0625	1.15683	Middle East	TE
Zt10	AC	442295	0.0584049	0.0625	0.934479	Middle East	TE
Zt10	AG	651343	0.0860097	0.0625	1.37616	Middle East	TE
Zt10	AT	508594	0.0671597	0.0625	1.07456	Middle East	TE
Zt10	CA	136047	0.017965	0.0625	0.28744	Middle East	TE
Zt10	CC	365590	0.0482761	0.0625	0.772417	Middle East	TE
Zt10	CG	495606	0.0654447	0.0625	1.04711	Middle East	TE
Zt10	CT	650805	0.0859386	0.0625	1.37502	Middle East	TE
Zt10	GA	431487	0.0569778	0.0625	0.911644	Middle East	TE
Zt10	GC	415537	0.0548716	0.0625	0.877945	Middle East	TE
Zt10	GG	363416	0.047989	0.0625	0.767824	Middle East	TE
Zt10	GT	432273	0.0570815	0.0625	0.913305	Middle East	TE
Zt10	TA	1035087	0.136683	0.0625	2.18693	Middle East	TE
Zt10	TC	424696	0.056081	0.0625	0.897296	Middle East	TE
Zt10	TG	132268	0.017466	0.0625	0.279455	Middle East	TE
Zt10	TT	540325	0.0713498	0.0625	1.1416	Middle East	TE
Zt1A5	AA	548858	0.0733705	0.0625	1.17393	Europe	TE
Zt1A5	AC	417259	0.0557786	0.0625	0.892457	Europe	TE
Zt1A5	AG	640267	0.0855899	0.0625	1.36944	Europe	TE
Zt1A5	AT	468415	0.062617	0.0625	1.00187	Europe	TE
Zt1A5	CA	216855	0.0289888	0.0625	0.463822	Europe	TE
Zt1A5	CC	374016	0.0499979	0.0625	0.799966	Europe	TE
Zt1A5	CG	439700	0.0587784	0.0625	0.940455	Europe	TE
Zt1A5	CT	639721	0.0855169	0.0625	1.36827	Europe	TE
Zt1A5	GA	445289	0.0595256	0.0625	0.952409	Europe	TE
Zt1A5	GC	432753	0.0578498	0.0625	0.925596	Europe	TE
Zt1A5	GG	370053	0.0494681	0.0625	0.79149	Europe	TE
Zt1A5	GT	415822	0.0555865	0.0625	0.889383	Europe	TE
Zt1A5	TA	864243	0.115531	0.0625	1.84849	Europe	TE
Zt1A5	TC	446330	0.0596647	0.0625	0.954635	Europe	TE
Zt1A5	TG	213814	0.0285823	0.0625	0.457317	Europe	TE
Zt1A5	TT	547240	0.0731542	0.0625	1.17047	Europe	TE
Zt1E4	AA	520822	0.0733513	0.0625	1.17362	Europe	TE
Zt1E4	AC	394623	0.0555777	0.0625	0.889243	Europe	TE
Zt1E4	AG	604252	0.0851013	0.0625	1.36162	Europe	TE
Zt1E4	AT	447588	0.0630372	0.0625	1.00859	Europe	TE
Zt1E4	CA	203870	0.0287125	0.0625	0.459401	Europe	TE
Zt1E4	CC	352701	0.0496735	0.0625	0.794776	Europe	TE
Zt1E4	CG	418140	0.0588898	0.0625	0.942237	Europe	TE
Zt1E4	CT	604836	0.0851836	0.0625	1.36294	Europe	TE
Zt1E4	GA	419008	0.059012	0.0625	0.944192	Europe	TE
Zt1E4	GC	413098	0.0581797	0.0625	0.930875	Europe	TE
Zt1E4	GG	353848	0.0498351	0.0625	0.797361	Europe	TE
Zt1E4	GT	397502	0.0559832	0.0625	0.895731	Europe	TE
Zt1E4	TA	824040	0.116056	0.0625	1.85689	Europe	TE
Zt1E4	TC	419199	0.0590389	0.0625	0.944623	Europe	TE
Zt1E4	TG	207115	0.0291696	0.0625	0.466713	Europe	TE
Zt1E4	TT	519720	0.0731961	0.0625	1.17114	Europe	TE
Zt3D1	AA	514144	0.0730637	0.0625	1.16902	Europe	TE
Zt3D1	AC	393661	0.0559421	0.0625	0.895074	Europe	TE
Zt3D1	AG	599925	0.0852538	0.0625	1.36406	Europe	TE
Zt3D1	AT	452371	0.0642853	0.0625	1.02856	Europe	TE
Zt3D1	CA	195663	0.0278052	0.0625	0.444883	Europe	TE
Zt3D1	CC	346114	0.0491854	0.0625	0.786966	Europe	TE
Zt3D1	CG	407305	0.057881	0.0625	0.926097	Europe	TE
Zt3D1	CT	604206	0.0858621	0.0625	1.37379	Europe	TE
Zt3D1	GA	402090	0.05714	0.0625	0.914239	Europe	TE
Zt3D1	GC	408017	0.0579822	0.0625	0.927716	Europe	TE
Zt3D1	GG	346579	0.0492514	0.0625	0.788023	Europe	TE
Zt3D1	GT	394339	0.0560385	0.0625	0.896616	Europe	TE
Zt3D1	TA	848585	0.12059	0.0625	1.92944	Europe	TE
Zt3D1	TC	405719	0.0576557	0.0625	0.922491	Europe	TE
Zt3D1	TG	197039	0.0280007	0.0625	0.448011	Europe	TE
Zt3D1	TT	521175	0.0740628	0.0625	1.18501	Europe	TE
Zt3D7	AA	530280	0.0728397	0.0625	1.16544	Europe	TE
Zt3D7	AC	409390	0.0562342	0.0625	0.899747	Europe	TE
Zt3D7	AG	624900	0.0858368	0.0625	1.37339	Europe	TE
Zt3D7	AT	452183	0.0621123	0.0625	0.993796	Europe	TE
Zt3D7	CA	204531	0.0280946	0.0625	0.449513	Europe	TE
Zt3D7	CC	366683	0.0503679	0.0625	0.805886	Europe	TE
Zt3D7	CG	431091	0.059215	0.0625	0.947441	Europe	TE
Zt3D7	CT	624494	0.085781	0.0625	1.3725	Europe	TE
Zt3D7	GA	431607	0.0592859	0.0625	0.948575	Europe	TE
Zt3D7	GC	422501	0.0580351	0.0625	0.928562	Europe	TE
Zt3D7	GG	367458	0.0504744	0.0625	0.80759	Europe	TE
Zt3D7	GT	404821	0.0556066	0.0625	0.889705	Europe	TE
Zt3D7	TA	850760	0.116861	0.0625	1.86978	Europe	TE
Zt3D7	TC	428286	0.0588297	0.0625	0.941276	Europe	TE
Zt3D7	TG	202827	0.0278605	0.0625	0.445768	Europe	TE
Zt3D7	TT	528255	0.0725616	0.0625	1.16099	Europe	TE
